# Supplementary material for: Direct ab initio MD study on the interaction of hydroperoxy radical (HOO) with water molecules
Source: Royal Society of Chemistry journal article supplement (doi:10.1039/b923310e), 2010-01-01
Supplement: b923310e.pdf [file b923310e.pdf]

## SUPPORTING INFORMATION

### Direct ab-initio MD study on the interaction of hydroperoxy radical (HOO) with water molecules

Hiroto TACHIKAWA\* and Shigeaki ABE<sup>#</sup>

*Division of Materials Chemistry, Graduate School of Engineering,  
Hokkaido University, Sapporo 060-8628, JAPAN*

<sup>#</sup>*Department of Biomedical, Dental Medicals and Engineering, Graduate School of Dental Medicine,  
Hokkaido University, Sapporo 060-8586, JAPAN*

#### 1. Electron capture of defective graphene ( $n=19$ )

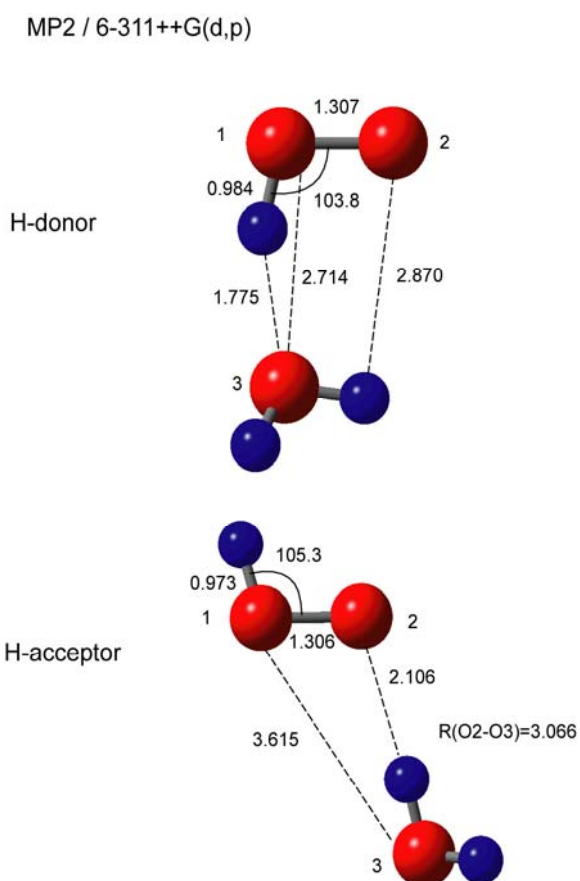

*Figure S1.* Optimized structure of HOO-H<sub>2</sub>O complexes calculated at the MP2/6-311++G(d,p) level.

CCSD / 6-311++G(d,p)

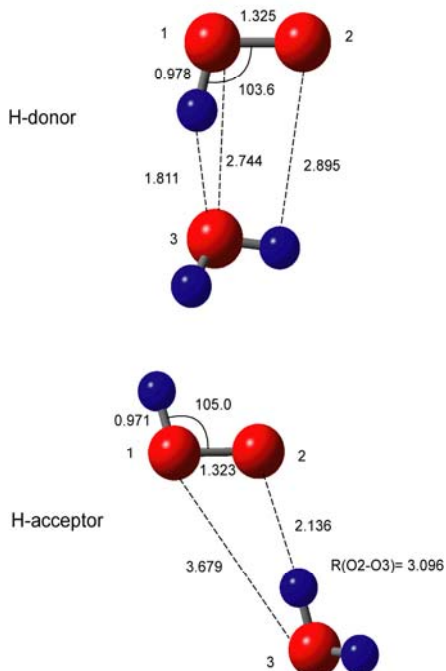

**Figure S2.** Optimized structure of HOO-H<sub>2</sub>O complexes calculated at the CCSD/6-311++G(d,p) level.

QCISD / 6-311++G(d,p)

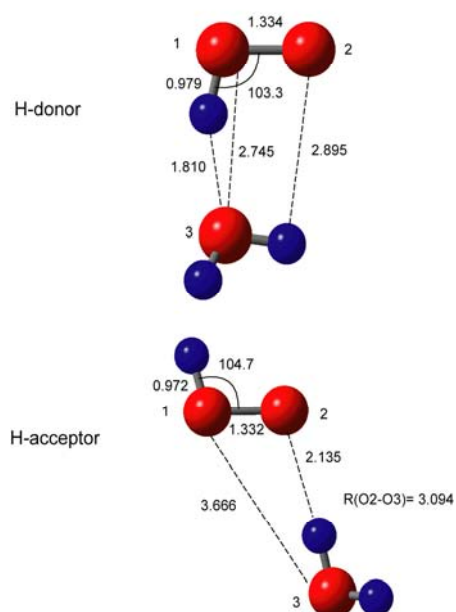

**Figure S3.** Optimized structure of HOO-H<sub>2</sub>O complexes calculated at the QCISD/6-311++G(d,p) level.

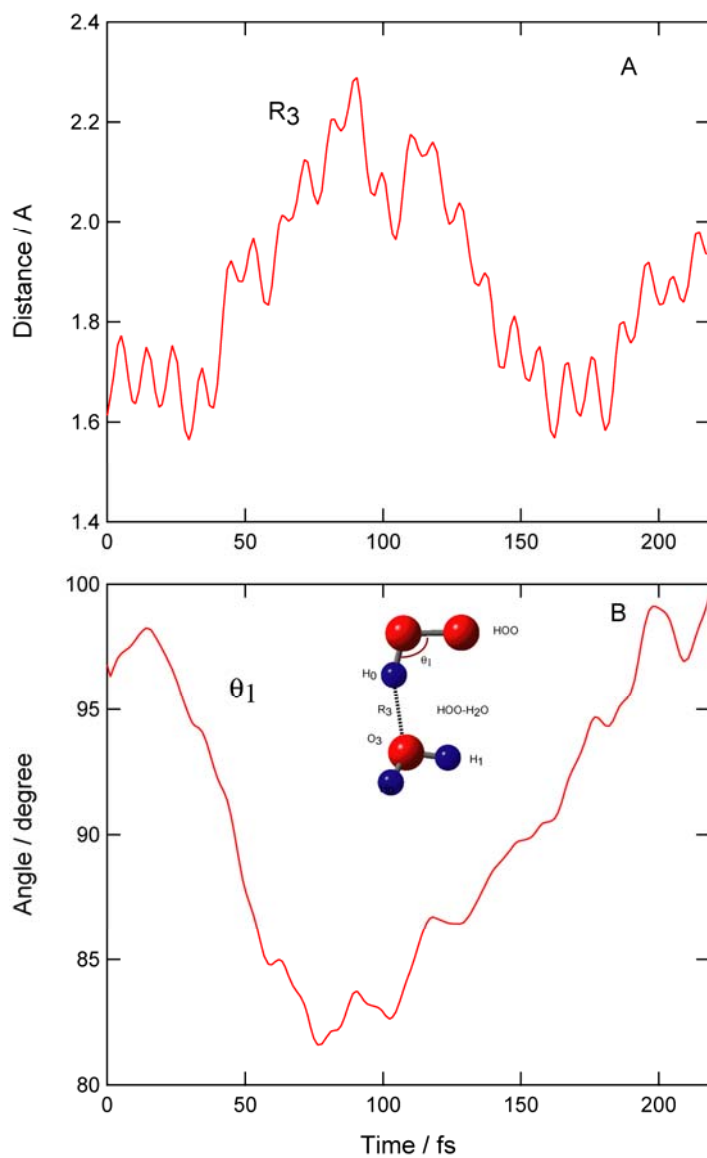

*Figure S4.* Time profile of bond distance and angles ( $R_3$  and  $\theta_1$ ) of HOO-H<sub>2</sub>O calculated at the MP2/6-311++G(d,p) level.

**Table S1.** Total energies (E in a.u), dipole moments (in Debye), number of imaginary frequencies (Im), relative energies ( $\Delta E$  in kcal/mol) and types of structural forms of HOO-H<sub>2</sub>O 1:1 complexes obtained at the B3LYP/6-311++G(d,p) level.

| No | E            | dipole | Im | $\Delta E$ | type       |
|----|--------------|--------|----|------------|------------|
| 1  | -227.4322055 | 3.882  | 0  | 0.00       | H-donor    |
| 2  | -227.4322043 | 3.8856 | 0  | 0.00       | H-donor    |
| 3  | -227.4322054 | 3.8778 | 0  | 0.00       | H-donor    |
| 4  | -227.4322055 | 3.8875 | 0  | 0.00       | H-donor    |
| 5  | -227.4322056 | 3.8849 | 0  | 0.00       | H-donor    |
| 6  | -227.4322052 | 3.8765 | 0  | 0.00       | H-donor    |
| 7  | -227.4322054 | 3.885  | 0  | 0.00       | H-donor    |
| 8  | -227.4322053 | 3.8827 | 0  | 0.00       | H-donor    |
| 9  | -227.4322056 | 3.8832 | 0  | 0.00       | H-donor    |
| 10 | -227.4322051 | 3.8873 | 0  | 0.00       | H-donor    |
| 11 | -227.4322055 | 3.8866 | 0  | 0.00       | H-donor    |
| 12 | -227.4322055 | 3.8829 | 0  | 0.00       | H-donor    |
| 13 | -227.4322056 | 3.8835 | 0  | 0.00       | H-donor    |
| 14 | -227.4322055 | 3.8763 | 0  | 0.00       | H-donor    |
| 15 | -227.4322056 | 3.8811 | 0  | 0.00       | H-donor    |
| 16 | -227.4218095 | 4.861  | 0  | 6.52       | H-acceptor |
| 17 | -227.4322056 | 3.8817 | 0  | 0.00       | H-donor    |
| 18 | -227.4218922 | 4.7673 | 0  | 6.47       | H-acceptor |
| 19 | -227.421942  | 4.071  | 0  | 6.44       | H-acceptor |
| 20 | -227.4219417 | 4.0777 | 0  | 6.44       | H-acceptor |

Table S2. Optimized parameters of HOO--H<sub>2</sub>O 1:1 complexes. CP means the geometrical parameters after the counterpoise correction.

|            | MP2    | CCSD   | QCISD  | MP2+CP |
|------------|--------|--------|--------|--------|
| r1         | 0.9836 | 0.9783 | 0.9788 | 0.9809 |
| r2         | 1.3069 | 1.3254 | 1.3345 | 1.3064 |
| r3         | 0.962  | 0.9602 | 0.9605 | 0.9611 |
| r4         | 0.9605 | 0.9588 | 0.9591 | 0.9592 |
| R1         | 2.7142 | 2.7444 | 2.7435 | 2.7827 |
| R2         | 2.8693 | 2.8947 | 2.8962 | 2.8273 |
| R3         | 1.7744 | 1.8114 | 1.8089 | 1.8672 |
| $\theta_1$ | 103.8  | 103.6  | 103.3  | 104.2  |
| $\theta_2$ | 104.6  | 104.9  | 104.9  | 105.0  |
| $\theta_3$ | 97.9   | 98.3   | 98.5   | 95.2   |

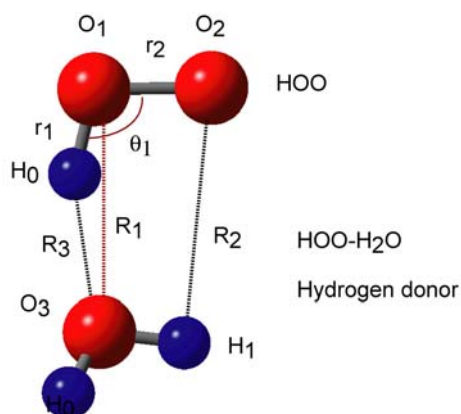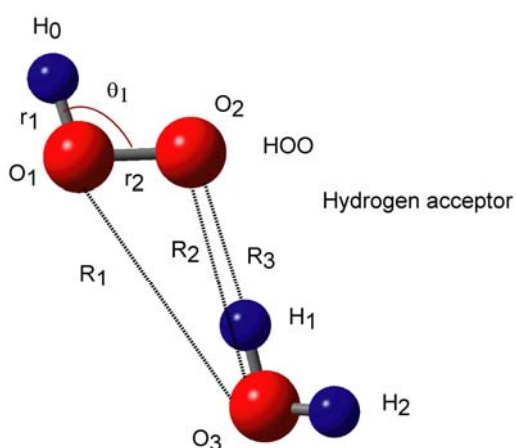

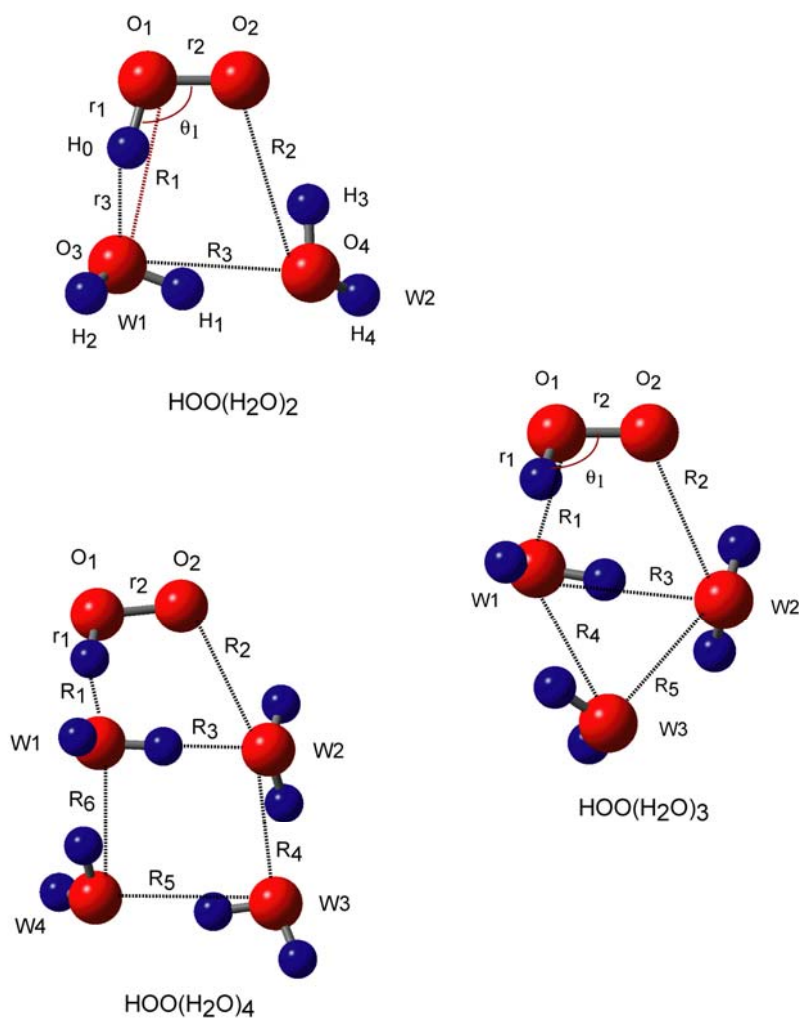

**Figure S5.** Optimized structure of HOO(H<sub>2</sub>O)<sub>n</sub> complexes ( $n=2-4$ ) calculated at the MP2/6-311++G(d,p) level.

**Table S3.** Isotropic Fermi Contact Couplings (in gauss) of HOO-H<sub>2</sub>O (donor form) calculated at the several levels of theory with 6-311++G(d,p) and 6-311++G(2d,2p) basis sets..

| No | atom | MP2       | CCSD      | QCISD     | QCISD <sup>a</sup> |
|----|------|-----------|-----------|-----------|--------------------|
| 1  | O    | -20.70852 | -21.20114 | -20.11423 | -21.09794          |
| 2  | O    | -16.96015 | -12.85125 | -12.12399 | -12.50880          |
| 3  | H    | -13.28125 | -10.16353 | -10.03438 | -10.22127          |
| 4  | O    | 0.68981   | 0.48859   | 0.48868   | 0.43965            |
| 5  | H    | 0.04245   | 0.03382   | 0.03368   | 0.09839            |
| 6  | H    | -0.05624  | -0.03453  | -0.03026  | -0.03038           |

<sup>a</sup> Result of 6-311++G(2d,2p) basis set.

**Table S4.** Total energies (in a.u) and relative energies ( $\Delta E_{\text{rel}}$  in kcal/mol) between donor and acceptor forms of the 1:1 complexes.

| method                | donor        | acceptor     | $\Delta E_{\text{rel}}$ |
|-----------------------|--------------|--------------|-------------------------|
| MP2/6-311++G(d,p)     | -226.88467   | -226.8743    | 6.50                    |
| CCSD/6-311++G(d,p)    | -226.90731   | -226.89767   | 6.05                    |
| QCISD/6-311++G(d,p)   | -226.91046   | -226.90084   | 6.04                    |
| MP2/6-311++G(2d,p)    | -226.93379   | -226.92364   | 6.37                    |
| QCISD/6-311++G(2d,2p) | -226.9648947 | -226.9561799 | 5.47                    |

Relative energy is defined by  $\Delta E_{\text{rel}} = E(\text{acceptor}) - E(\text{donor})$ , where  $E(M)$  means total energy of M-form.
